# Supplementary material for: Hydrogen Incorporation in RuxTi1−xO2 Mixed Oxides Promotes Total Oxidation of Propane
Source: MDPI journal article supplement (doi:10.3390/inorganics11080330), 2023-08-07
Supplement: s1 [file s1]

## Supporting Information

### Hydrogen Incorporation in $\text{Ru}_x\text{Ti}_{1-x}\text{O}_2$ Mixed Oxides Promotes Total Oxidation of Propane

*Wei Wang,<sup>1,2</sup> Yu Wang,<sup>1,2</sup> Phillip Timmer,<sup>2</sup> Alexander Spriewald-Luciano,<sup>2</sup> Tim Weber,<sup>2</sup> Lorena Glatthaar,<sup>2</sup> Yun Guo,<sup>1\*</sup> Bernd M. Smarsly,<sup>2\*</sup> Herbert Over<sup>2\*</sup>*

*1) Key Laboratory for Advanced Materials, Research Institute of Industrial Catalysis, School of Chemistry and Molecular Engineering, East China University of Science and Technology, Shanghai 200237, China*

*2) Institute of Physical Chemistry, Justus Liebig University, Heinrich-Buff-Ring 17, D-35392 Giessen, Germany*

\* Correspondence: Herbert.Over@phys.chemie.uni-giessen.de;  
Bernd.Smarsly@phys.Chemie.uni-giessen.de; yunguo@ecust.edu.cn

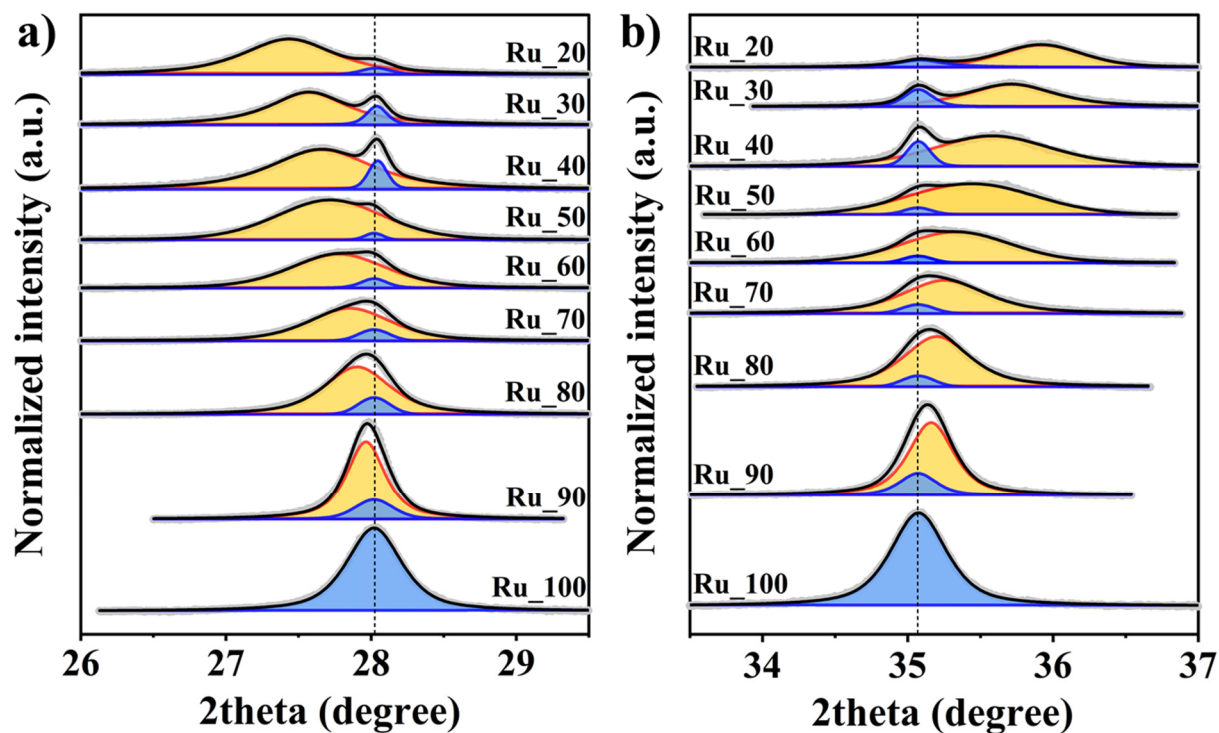

**Figure S1:** Decomposition of the (110) (a) and the (101) (b) reflection of Ru<sub>x</sub> as a function of composition  $x$  in order to extract lattice parameters of the mixed phase.

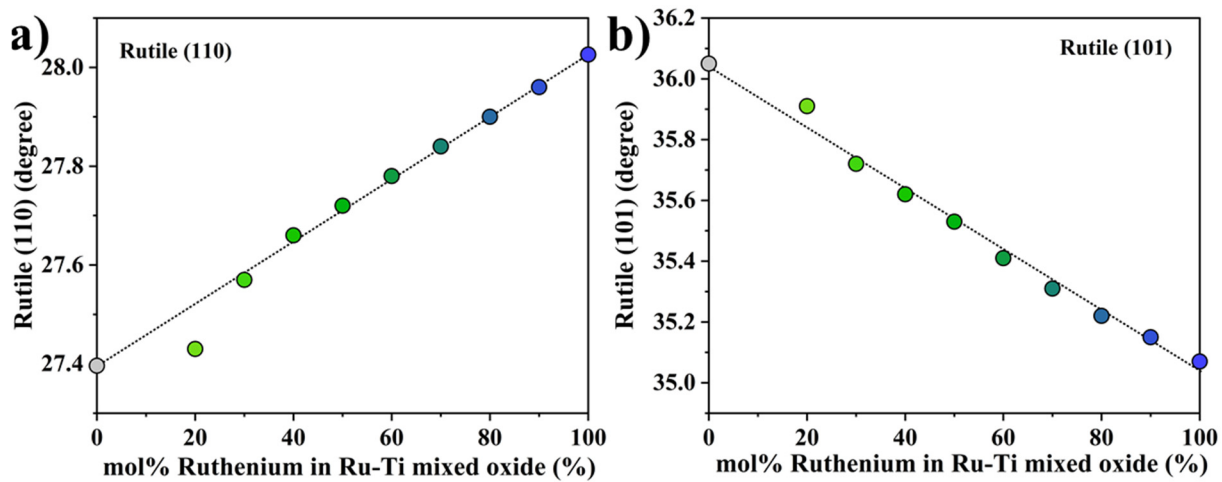

**Figure S2:** Peak shift of rutile (a) (110) and (b) (101) reflections in the mixed Ru<sub>x</sub>Ti<sub>1-x</sub>O<sub>2</sub> oxide phase as a function of the nominal composition  $x$ .

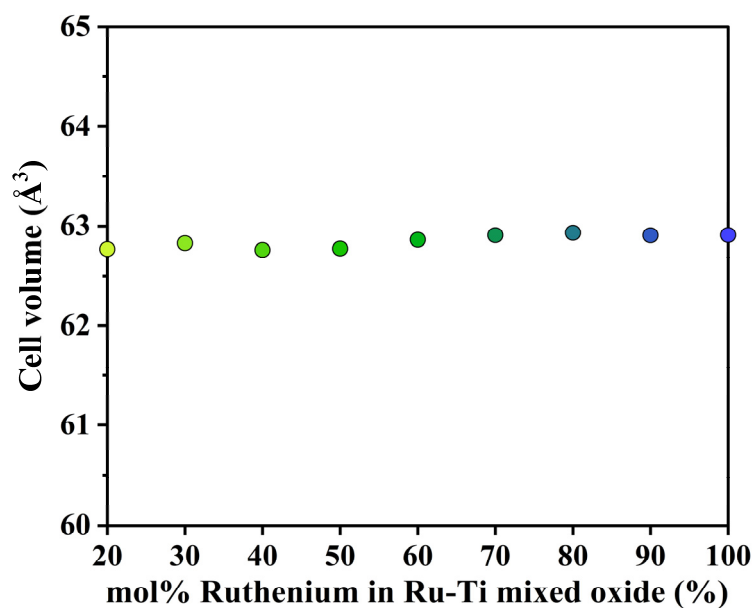

**Figure S3:** Calculated cell volumes of Ru<sub>x</sub> as a function of composition  $x$  based on the unit cell parameters  $a/b$  and  $c$  of the mixed oxide Ru<sub>x</sub>Ti<sub>1-x</sub>O<sub>2</sub> phase.

**Table S1:** Calculation of grain size and microstrain of Ru-Ti mixed oxides catalysts by Williamson-Hall method.

| Catalysts | Grain size (RuO <sub>2</sub> ) (nm) <sup>a</sup> | Microstrain (RuO <sub>2</sub> ) <sup>a</sup> | Grain size (Ru-Ti) (nm) <sup>b</sup> | Microstrain (Ru-Ti) <sup>b</sup> |
|-----------|--------------------------------------------------|----------------------------------------------|--------------------------------------|----------------------------------|
| Ru_100    | 25.87                                            | 0.0020                                       | -                                    | -                                |
| Ru_90     | 29.17                                            | 0.0020                                       | 50.78                                | 0.0020                           |
| Ru_80     | 36.08                                            | 0.0020                                       | 19.87                                | 0.0004                           |
| Ru_70     | 54.85                                            | 0.0020                                       | 14.14                                | 0.0006                           |
| Ru_60     | 72.16                                            | 0.0020                                       | 9.79                                 | 0.0008                           |
| Ru_50     | 137.11                                           | 0.0006                                       | 7.21                                 | 0.0002                           |
| Ru_40     | 114.26                                           | 0.0020                                       | 9.79                                 | 0.0040                           |
| Ru_30     | 72.16                                            | 0.0005                                       | 12.46                                | 0.0020                           |
| Ru_20     | 69.15                                            | 0.0004                                       | 11.56                                | 0.0002                           |

a: Determined by Williamson-Hall method from the (110), (101), (020) and (111) reflections of RuO<sub>2</sub> phase.

b: Determined by Williamson-Hall method from the of (110), (101), (020) and (111) reflections of Ru-Ti mixed oxide phase.

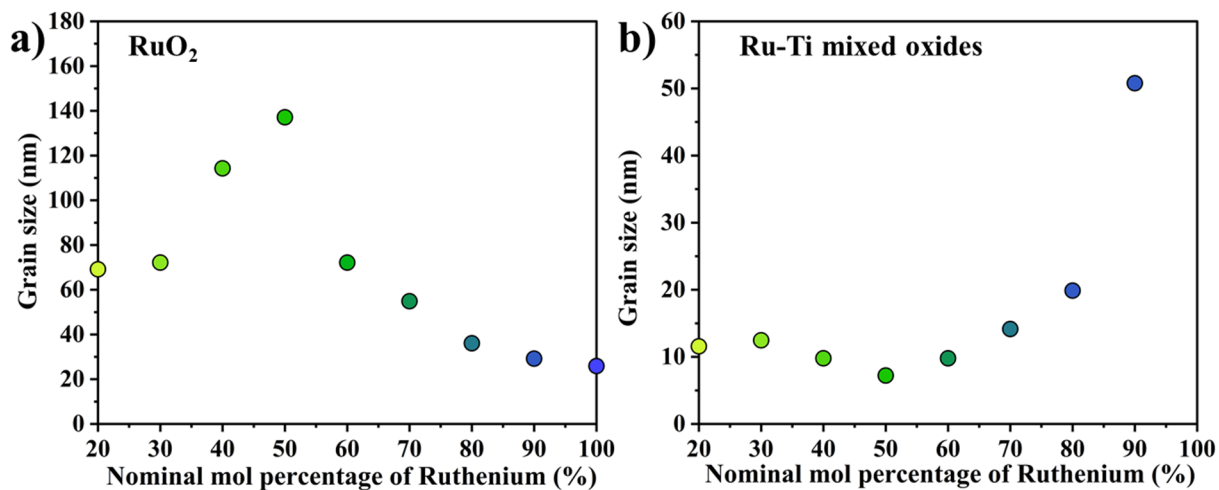

**Figure S4:** Calculated crystallite size of (a) RuO<sub>2</sub> phase and (b) Ru-Ti solid solution phase as a function of the nominal composition  $x$  given in mol% as determined by Williamson-Hall method.

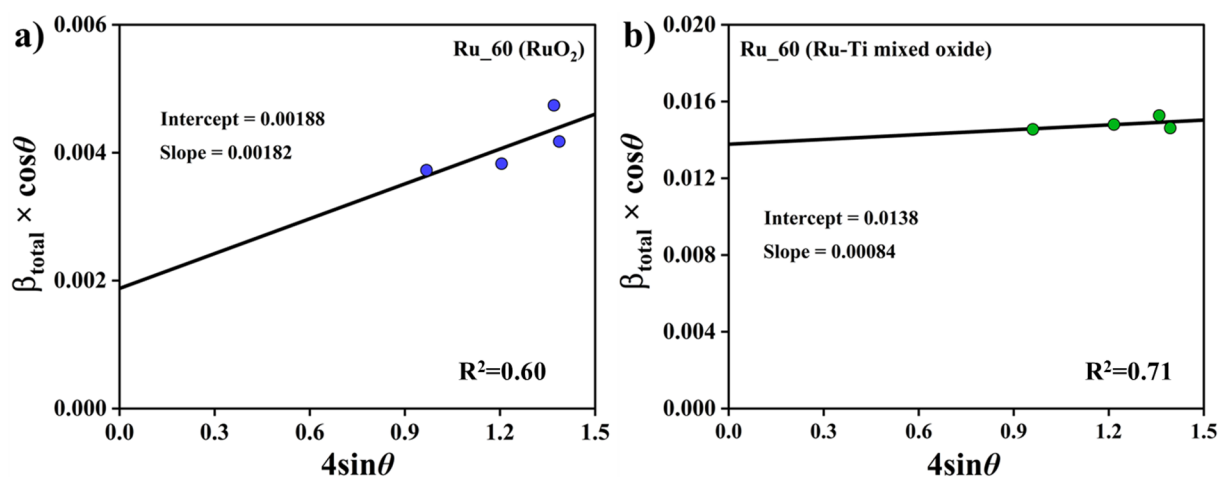

**Figure S5:** Williamson-Hall plot of (a) RuO<sub>2</sub> phase and (b) Ru-Ti solid solution phase as exemplified by Ru<sub>60</sub> sample.

**Table S2:** Optimized fitting parameters for the deconvolution of Ru 3d, Ru 3p, Ti 2p and O 1s photoelectron spectra used in our study.

| Ru3d-5/2        |                      |      | Ru3d-5/2 sat         |      | Ru3d-3/2             |         | Ru3d-3/2 sat         |         | Ru3d-5/2 metal        |         | Ru3d-3/2 metal           |      |
|-----------------|----------------------|------|----------------------|------|----------------------|---------|----------------------|---------|-----------------------|---------|--------------------------|------|
| Line shape      | LF (0.4, 1, 45, 280) |      | LF (0.4, 1, 45, 280) |      | LF (0.6, 1, 45, 280) |         | LF (0.6, 1, 45, 280) |         | LF (1.2, 1, 400; 280) |         | LF (1.01, 1.25, 500, 50) |      |
| Cat.            | BE (eV)              | FWHM | BE (eV)              | FWHM | BE (eV)              | BE (eV) | FWHM                 | BE (eV) | FWHM                  | BE (eV) | BE (eV)                  | FWHM |
| Ru_100          | 280.72               | 0.71 | 282.69               | 1.81 | 284.89               | 1.32    | 286.86               | 2.43    | -                     | -       | -                        | -    |
| Ru_90           | 280.74               | 0.70 | 282.62               | 1.81 | 284.91               | 1.39    | 286.79               | 2.53    | -                     | -       | -                        | -    |
| Ru_80           | 280.77               | 0.71 | 282.56               | 2.08 | 284.93               | 1.24    | 286.73               | 2.51    | -                     | -       | -                        | -    |
| Ru_70           | 280.69               | 0.72 | 282.50               | 2.07 | 284.86               | 1.43    | 286.67               | 2.33    | -                     | -       | -                        | -    |
| Ru_60           | 280.72               | 0.78 | 282.46               | 2.03 | 284.89               | 1.36    | 286.63               | 2.48    | -                     | -       | -                        | -    |
| Ru_50           | 280.69               | 0.76 | 282.42               | 2.12 | 284.86               | 1.31    | 286.59               | 2.49    | -                     | -       | -                        | -    |
| Ru_40           | 280.84               | 0.79 | 282.38               | 1.88 | 285.01               | 1.29    | 286.64               | 2.29    | -                     | -       | -                        | -    |
| Ru_30           | 280.84               | 0.82 | 282.34               | 1.89 | 285.00               | 1.30    | 286.51               | 2.26    | -                     | -       | -                        | -    |
| Ru_20           | 280.90               | 0.93 | 282.31               | 1.86 | 285.12               | 1.47    | 286.48               | 2.30    | -                     | -       | -                        | -    |
| Ru_60_250R      | 280.83               | 0.85 | 281.59               | 1.89 | 285.00               | 1.22    | 285.75               | 2.10    | 280.25                | 0.58    | 284.42                   | 0.95 |
| Ru_60_250R_300O | 280.80               | 0.74 | 282.43               | 2.05 | 284.97               | 1.29    | 286.60               | 2.1     | 280.28                | 0.68    | 284.45                   | 0.95 |
| Ru3p-3/2        |                      |      | Ru3p-3/2 sat         |      | Ru3p-1/2             |         | Ru3p-1/2 sat         |         | Ti2p-3/2              |         | Ti2p-3/2                 |      |
| Line shape      | LF(1, 1, 45, 280)    |      | LF(1, 1, 45, 280)    |      | LF(1, 1, 45, 280)    |         | LF(1, 1, 45, 280)    |         | GL(30)                |         | GL(30)                   |      |
| Cat.            | BE (eV)              | FWHM | BE (eV)              | FWHM | BE (eV)              | FWHM    | BE (eV)              | FWHM    | BE (eV)               | FWHM    | BE (eV)                  | FWHM |
| Ru_100          | 462.51               | 3.11 | 465.26               | 4.34 | 484.91               | 3.2     | 487.60               | 5.07    | -                     | -       | -                        | -    |
| Ru_90           | 462.32               | 2.88 | 465.15               | 4.0  | 484.72               | 3.10    | 487.50               | 4.30    | 458.32                | 1.65    | 464.02                   | 2.0  |
| Ru_80           | 462.36               | 3.11 | 464.99               | 3.64 | 484.76               | 3.30    | 487.39               | 3.80    | 458.35                | 1.56    | 464.05                   | 2.25 |
| Ru_70           | 462.21               | 3.00 | 464.86               | 4.10 | 484.61               | 3.26    | 487.26               | 4.30    | 458.26                | 1.62    | 463.96                   | 2.20 |
| Ru_60           | 462.19               | 2.85 | 464.75               | 3.90 | 484.59               | 3.33    | 487.15               | 4.42    | 458.27                | 1.61    | 463.97                   | 2.16 |
| Ru_50           | 462.20               | 3.10 | 464.70               | 4.00 | 484.60               | 3.24    | 487.10               | 4.20    | 458.25                | 1.52    | 463.95                   | 2.22 |
| Ru_40           | 462.20               | 2.97 | 464.60               | 3.61 | 484.61               | 3.23    | 487.06               | 4.00    | 458.59                | 1.53    | 464.29                   | 2.31 |
| Ru_30           | 462.18               | 3.00 | 464.46               | 3.81 | 484.58               | 3.20    | 487.00               | 4.08    | 458.53                | 1.45    | 464.23                   | 2.23 |
| Ru_20           | 462.19               | 3.08 | 464.41               | 3.90 | 484.69               | 3.50    | 486.81               | 4.08    | 458.33                | 1.37    | 464.03                   | 2.20 |
| Ru_60_250R      | 461.73               | 2.90 | 463.76               | 4.10 | 484.13               | 2.90    | 486.16               | 4.15    | 458.27                | 1.33    | 463.97                   | 2.29 |
| Ru_60_250R_300O | 462.09               | 3.09 | 464.56               | 4.11 | 484.49               | 3.10    | 486.96               | 4.11    | 458.27                | 1.41    | 463.97                   | 2.17 |
|                 |                      |      | O-1s                 |      | OH/Oxygenated carbon |         |                      |         |                       |         |                          |      |
| Line shape      | LF(0.37,1.2,25,110)  |      |                      |      |                      | GL(30)  |                      |         |                       |         |                          |      |
| Cat.            | BE (eV)              |      | FWHM                 |      | BE (eV)              |         | FWHM                 |         |                       |         |                          |      |
| Ru_100          | 529.21               |      | 1.01                 |      | 531.98               |         | 2.90                 |         |                       |         |                          |      |
| Ru_90           | 529.28               |      | 1.0                  |      | 531.84               |         | 2.40                 |         |                       |         |                          |      |
| Ru_80           | 529.34               |      | 1.02                 |      | 531.90               |         | 1.40                 |         |                       |         |                          |      |
| Ru_70           | 529.26               |      | 1.05                 |      | 531.55               |         | 1.30                 |         |                       |         |                          |      |
| Ru_60           | 529.28               |      | 1.06                 |      | 531.83               |         | 1.28                 |         |                       |         |                          |      |
| Ru_50           | 529.25               |      | 1.03                 |      | 531.91               |         | 1.17                 |         |                       |         |                          |      |
| Ru_40           | 529.56               |      | 1.06                 |      | 531.99               |         | 1.04                 |         |                       |         |                          |      |
| Ru_30           | 529.54               |      | 1.04                 |      | 531.91               |         | 0.80                 |         |                       |         |                          |      |
| Ru_20           | 529.39               |      | 0.98                 |      | 531.87               |         | 0.96                 |         |                       |         |                          |      |
| Ru_60_250R      | 529.56               |      | 1.06                 |      | 531.87               |         | 1.19                 |         |                       |         |                          |      |
| Ru_60_250R_300O | 529.37               |      | 0.99                 |      | 531.78               |         | 1.39                 |         |                       |         |                          |      |

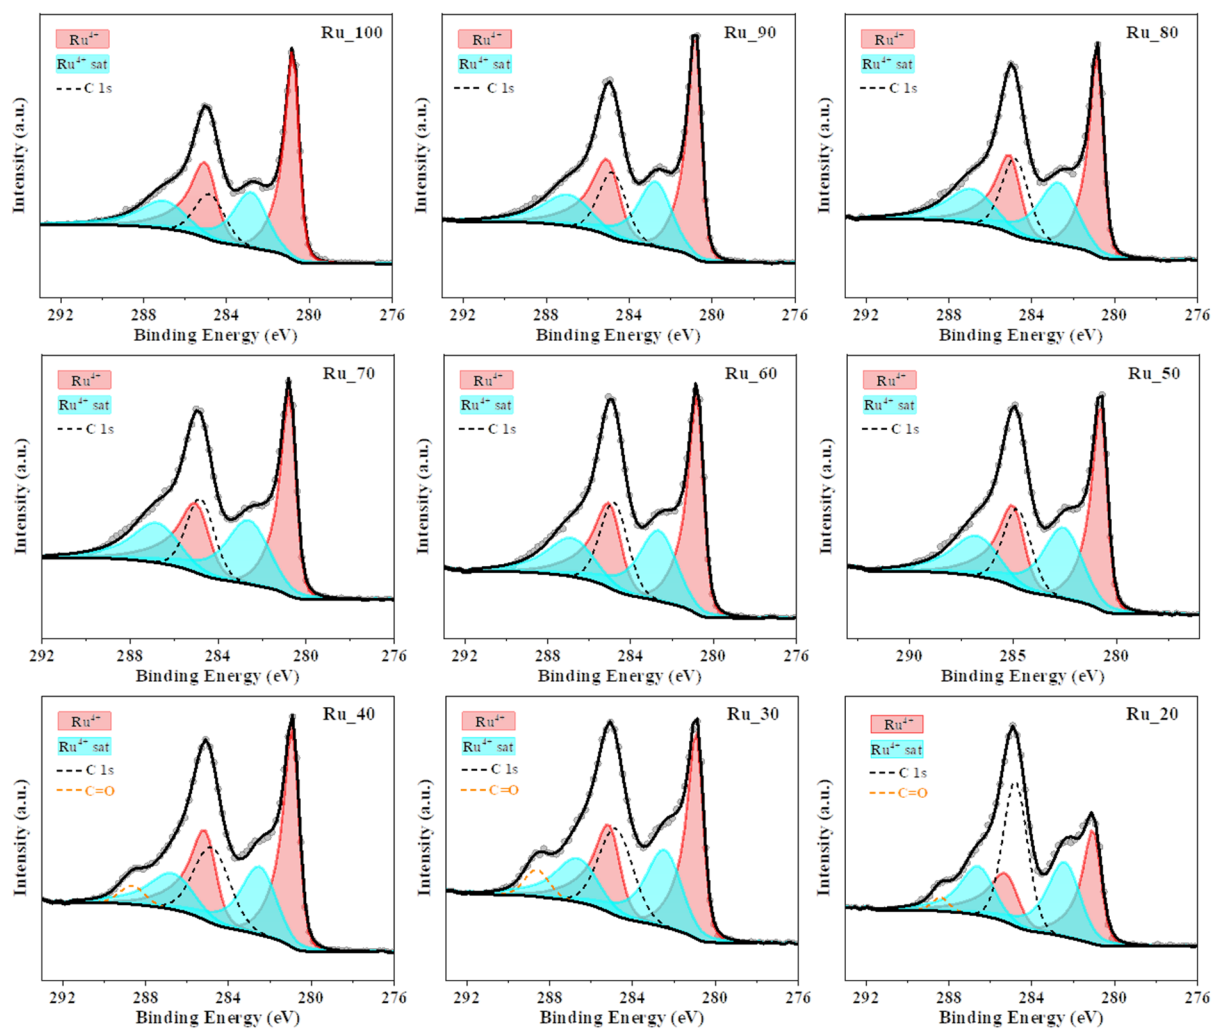

**Figure S6:** Deconvolution of Ru 3d XP spectra of freshly prepared Ru<sub>x</sub> catalysts.

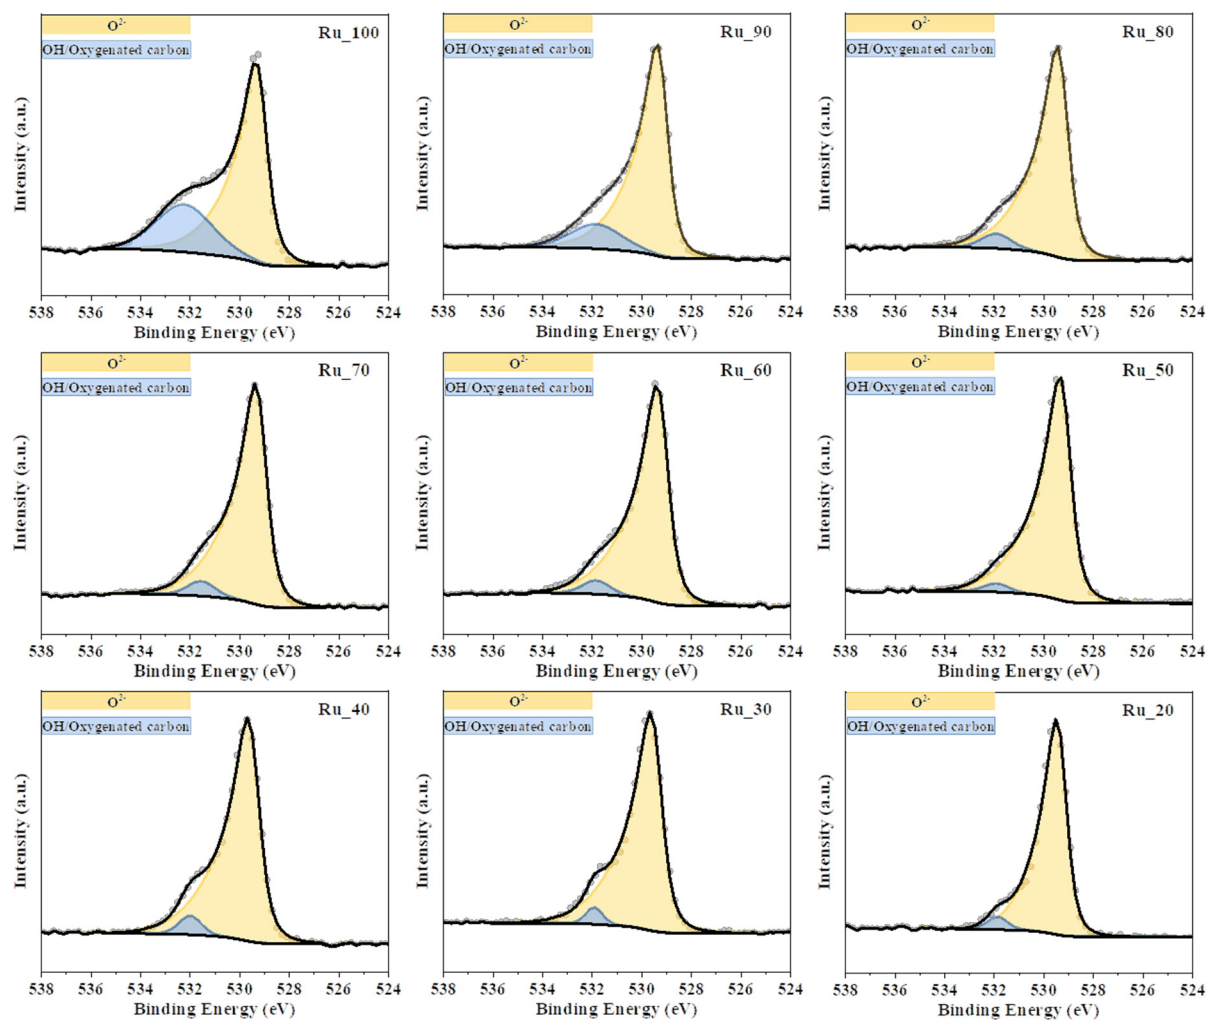

**Figure S7:** Deconvolution of O 1s spectra of freshly prepared Ru<sub>x</sub> catalysts with varying composition *x*.

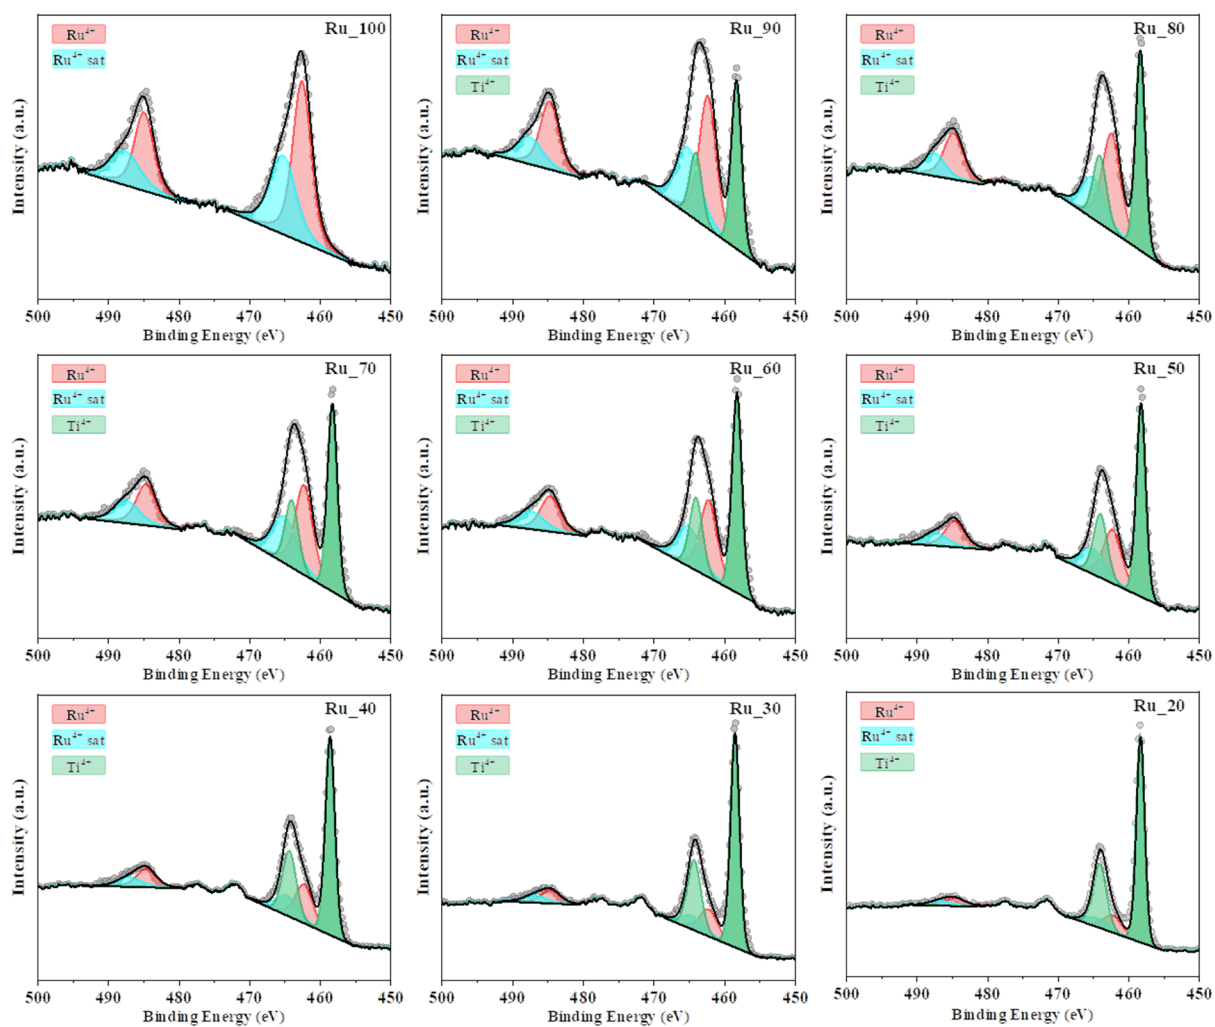

**Figure S8:** Deconvolution of Ru3p and Ti2p spectra of Ru<sub>x</sub> catalysts with varying composition *x*.



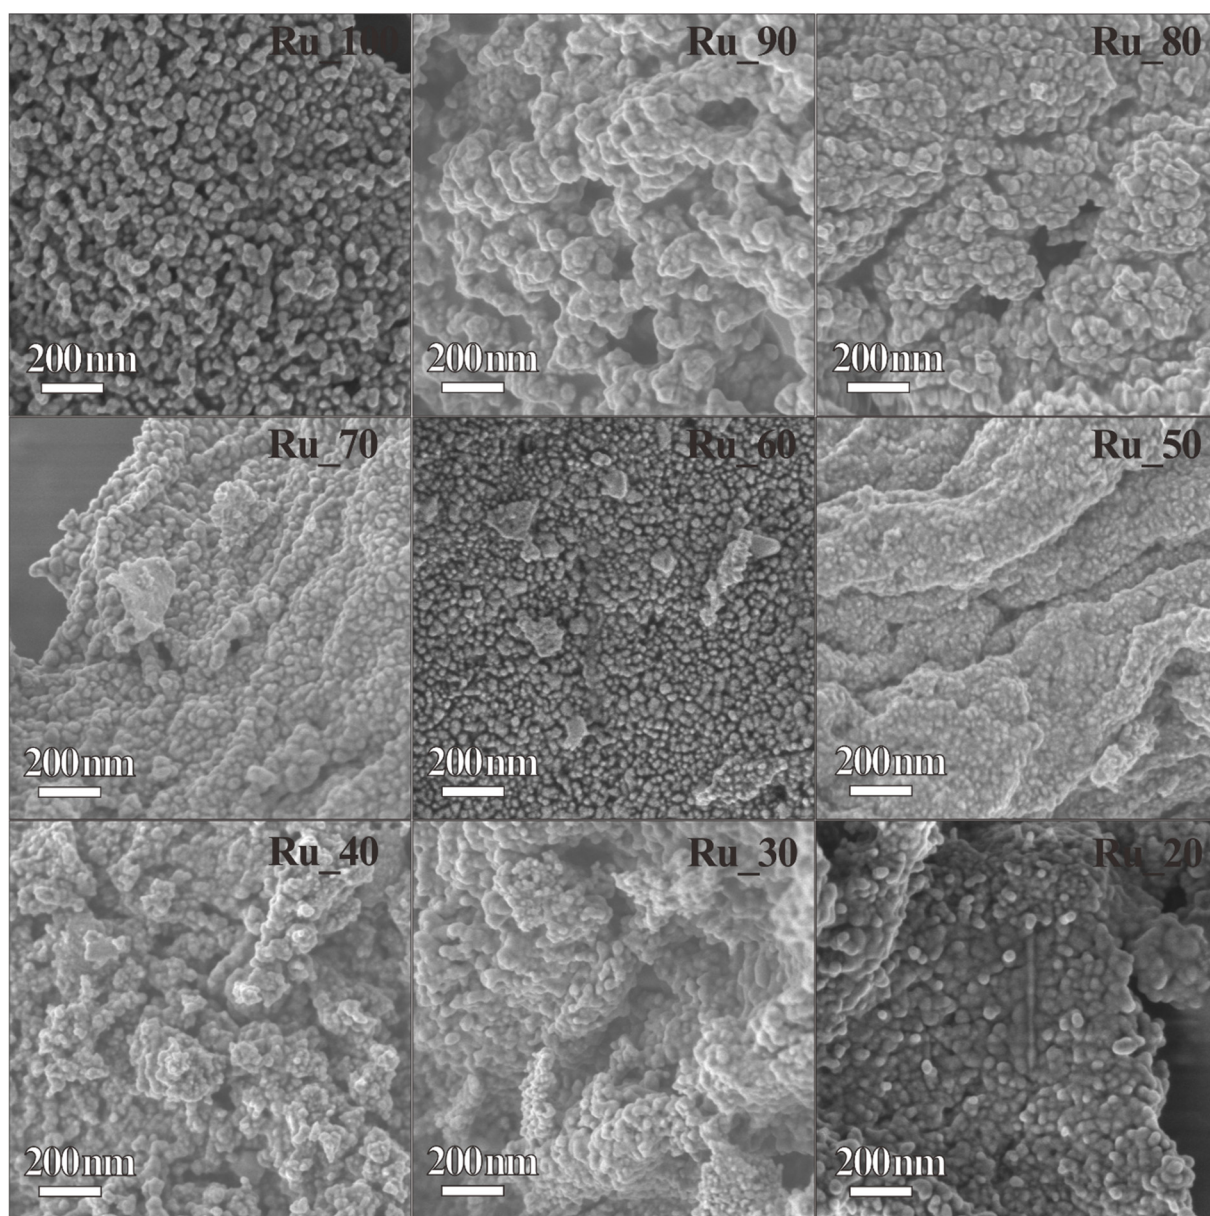

**Figure S9:** SEM micrographs for the various Ru<sub>x</sub> samples.

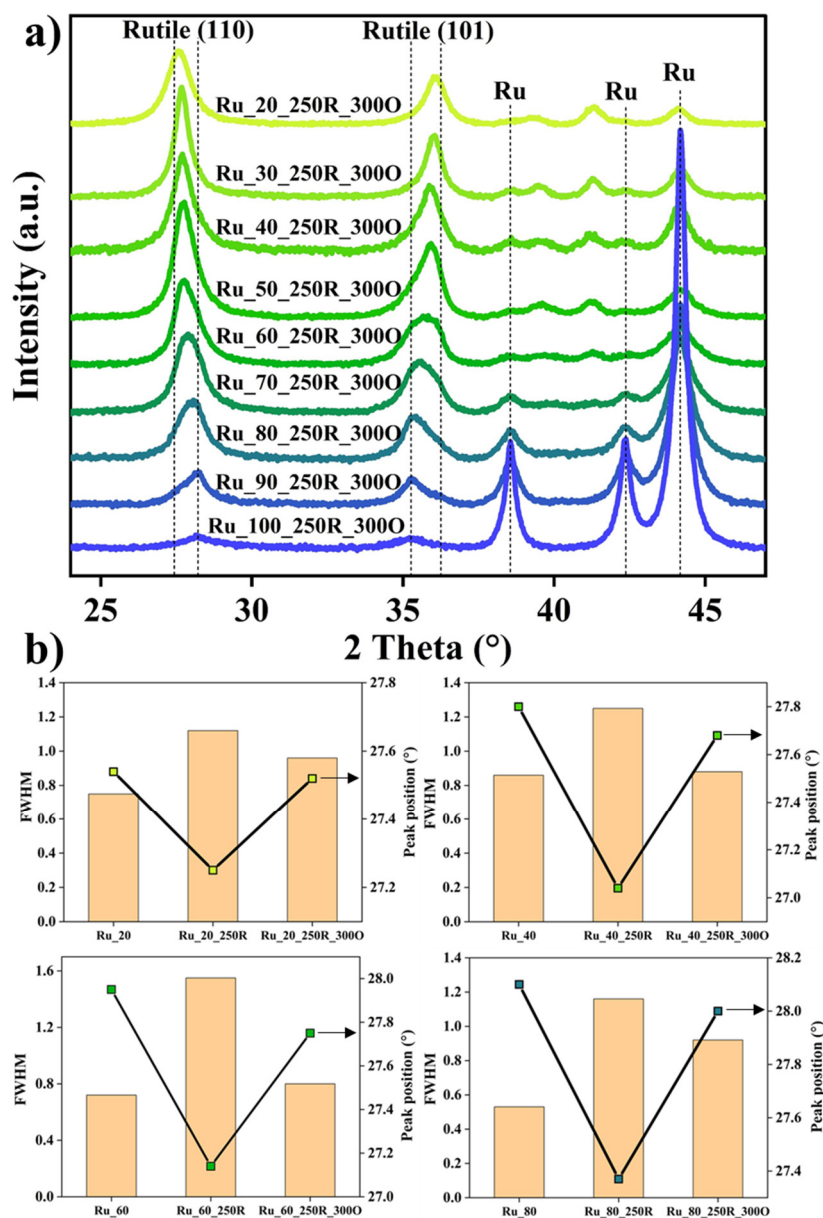

**Figure S10:** (a) XRD patterns of Ru<sub>x</sub>\_250R samples re-oxidized at 300 °C. (b) The changes of macrostrain (position) and microstrain (FWHM) of rutile (110) reflections of the Ru-Ti mixed oxide phase among the initial, reduced and re-oxidized Ru<sub>x</sub> samples.

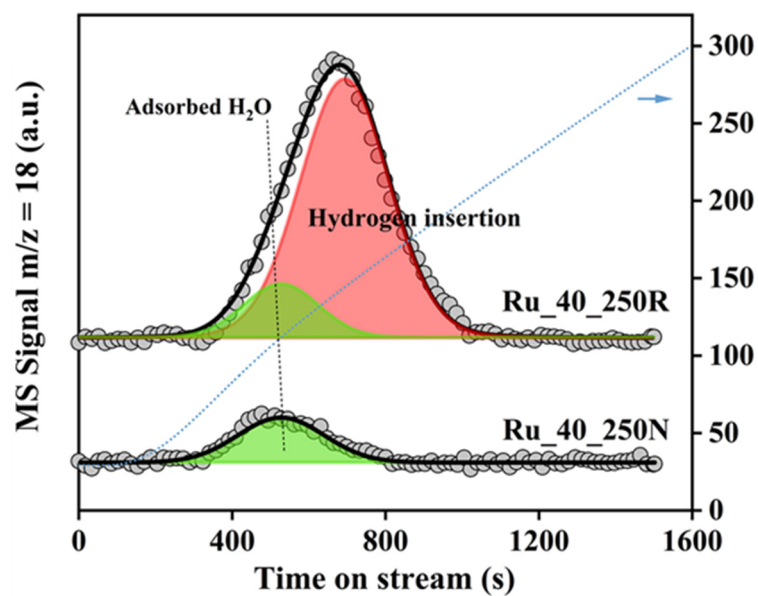

**Figure S11:** Peak deconvolution of H<sub>2</sub>O signal ( $m/z = 18$ ) of the Ru\_40\_250R and Ru\_40\_250N.

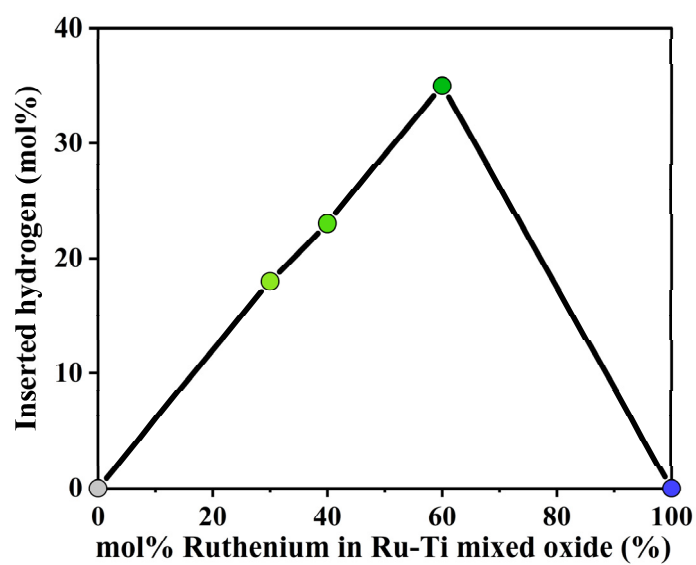

**Figure S12:** The calculated amount of incorporated hydrogen when varying the composition  $x$  of Ru <sub>$x$</sub> .



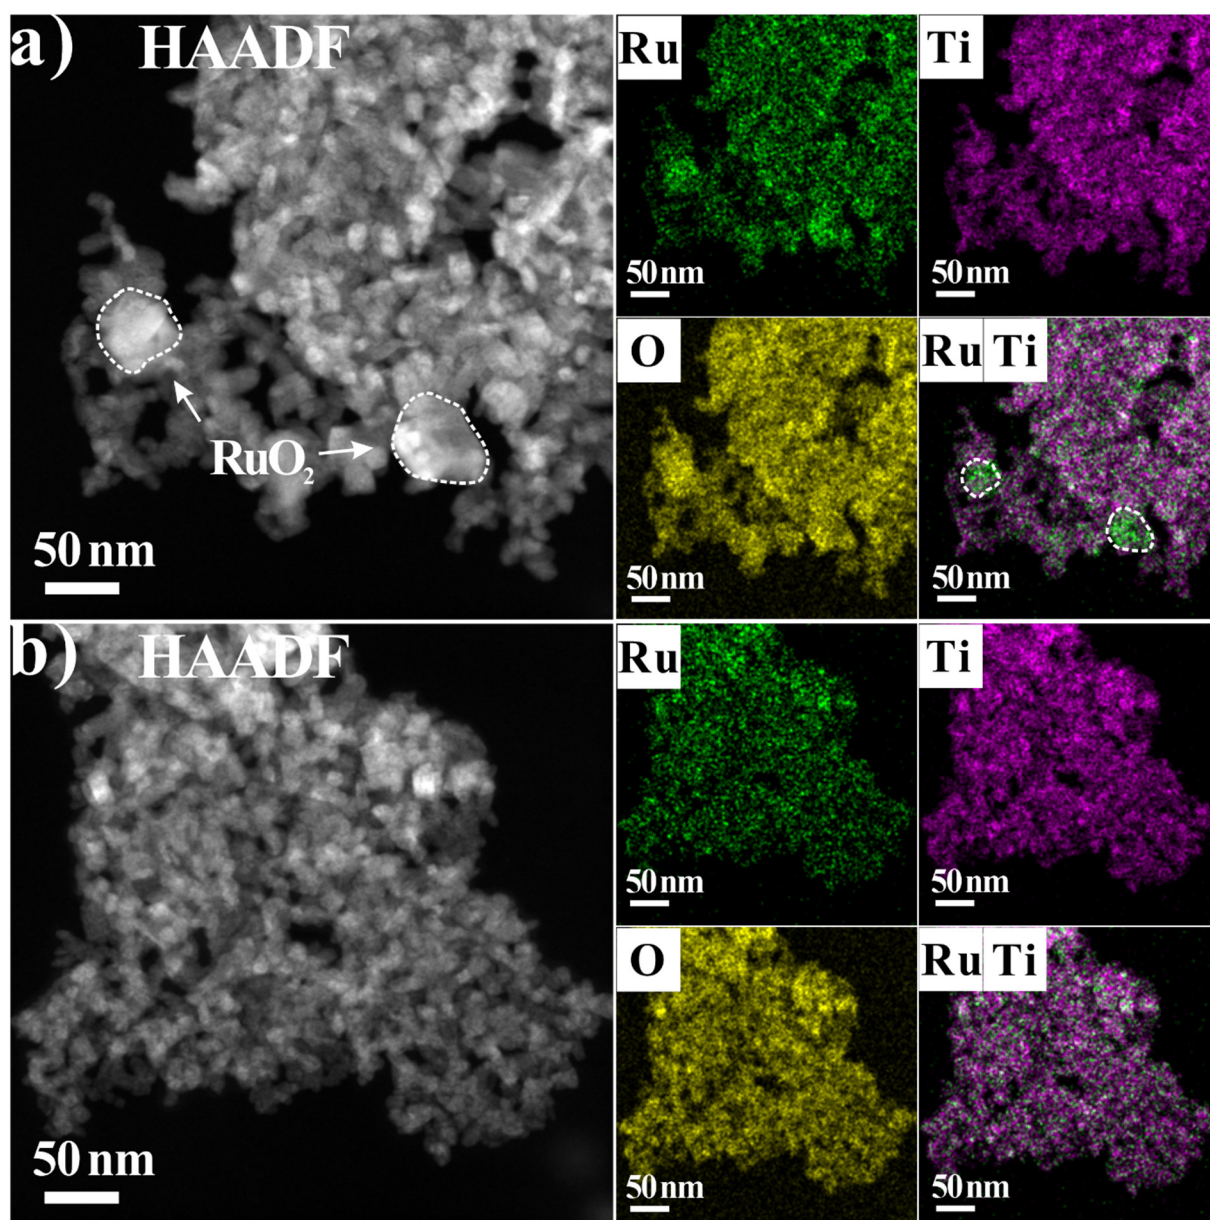

**Figure S13:** HAADF-STEM images and element mapping of (a) Ru\_60 and (b) Ru\_60\_250R.

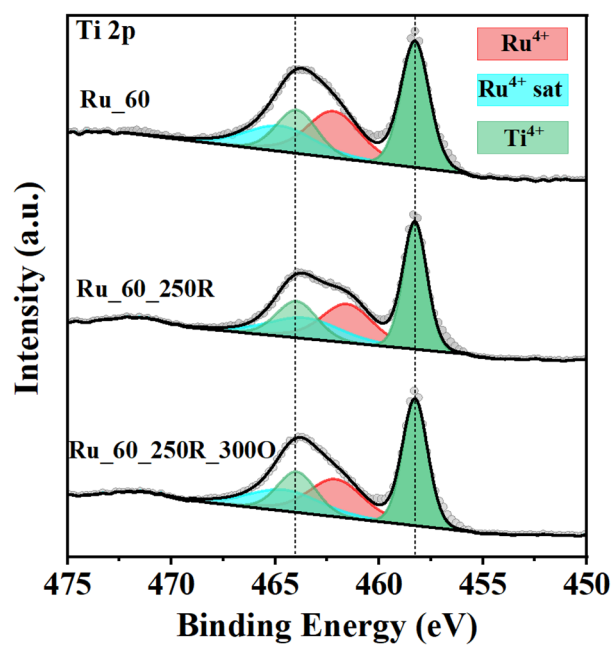

**Figure S14:** XPS-Ti 2p XP spectra of Ru\_60, Ru\_60\_250R and Ru\_60\_250R\_300O.

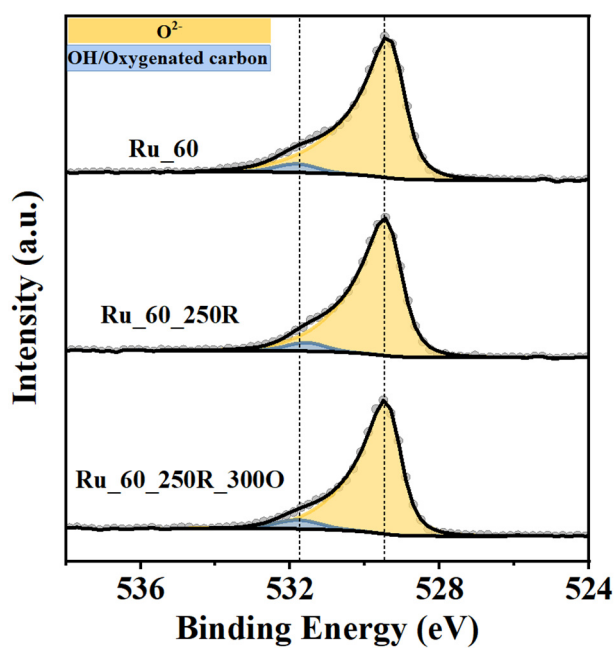

**Figure S15:** XPS-O 1s XP spectra of Ru\_60, Ru\_60\_250R and Ru\_60\_250R\_300O.

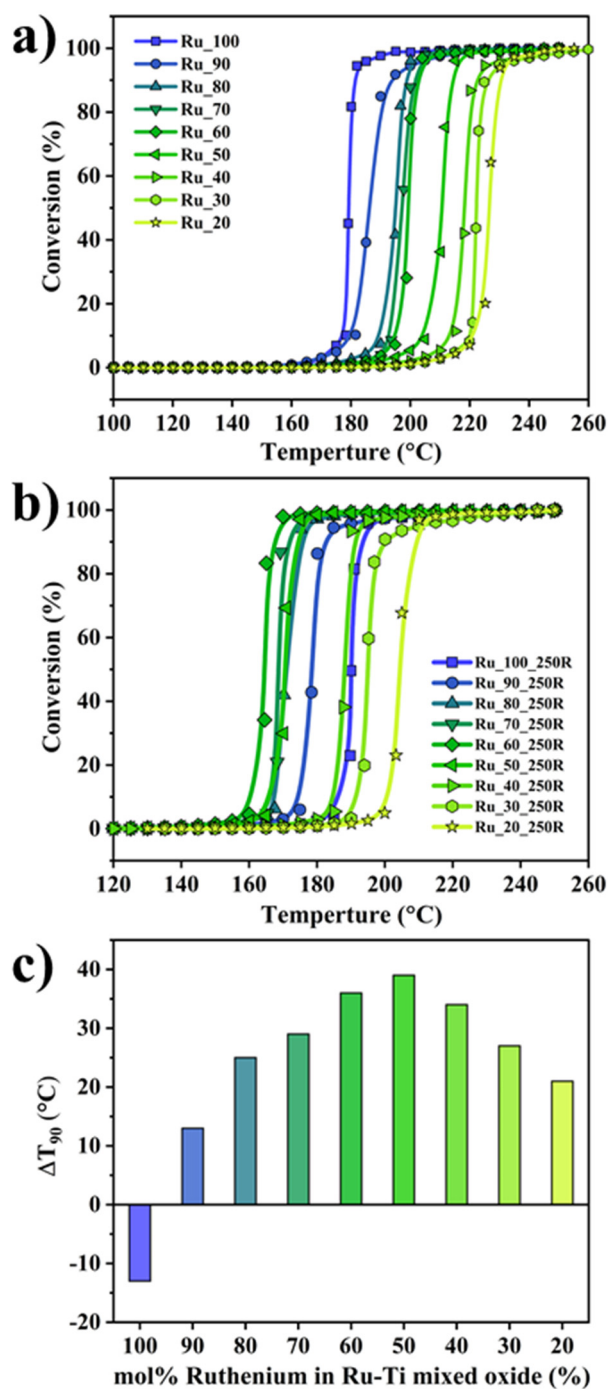

**Figure S16:** Light-off curves of catalytic propane combustion (1% propane, 5% O<sub>2</sub> balanced by 94% N<sub>2</sub>) over Ru<sub>x</sub> (a) and Ru<sub>x</sub>\_250R (b) (x ranging from 20% to 100% in steps of 10%) as a function of reaction temperature, when cycling the reaction temperature from 30 °C to 250 °C. The difference in T<sub>90</sub>, i.e. the temperature, where 90 % conversion is reached, for Ru<sub>x</sub> and Ru<sub>x</sub>\_250R is shown in panel c).

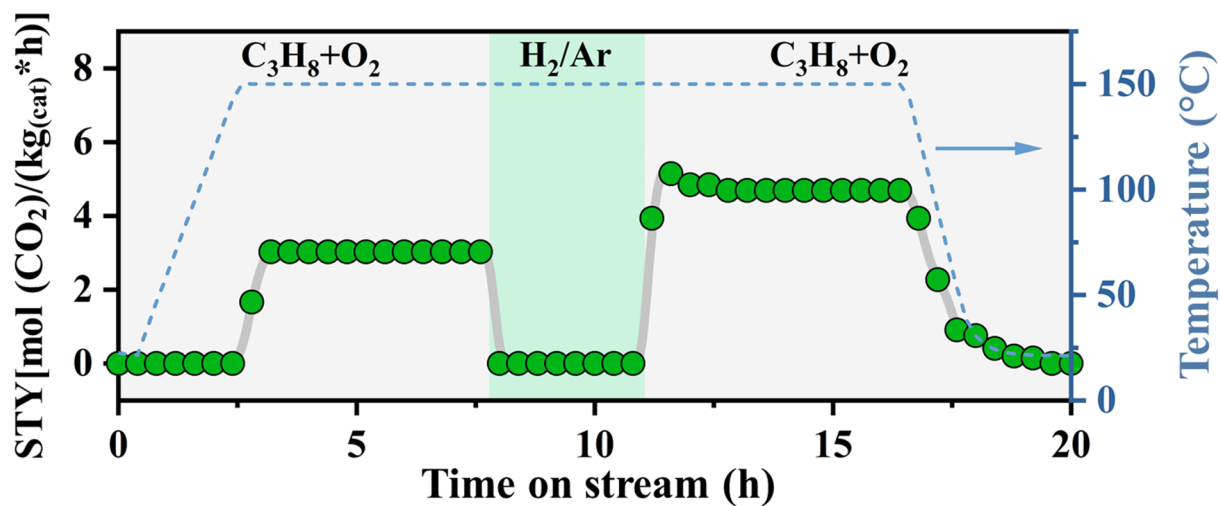

**Figure S17.** STY as a function of reaction time on catalytic propane oxidation over Ru\_60\_400R when keeping the reaction temperature at 150 °C (blue dotted line). The grey background represents total C<sub>3</sub>H<sub>8</sub> oxidation conditions: 1 vol% C<sub>3</sub>H<sub>8</sub>, 5 vol% O<sub>2</sub>, balanced by N<sub>2</sub>; total volume flow: 100 sccm/min, temperature ramp: 1 K/min. The green background represents the gas mixture during heating and cooling stage: 4% H<sub>2</sub>/Ar, total volume flow: 50 sccm/min. When reaching 150 °C, the gas composition is switched to the reaction mixture (grey background).
